# Supplementary material for: Ag decorated silica nanostructures for surface plasmon enhanced photocatalysis
Source: Royal Society of Chemistry journal article supplement (doi:10.1039/c8ra02543f), 2018-01-01
Supplement: c8ra02543f1.pdf [file c8ra02543f1.pdf]

## Ag Decorated Silica Nanostructures for Surface Plasmon Enhanced Photocatalysis,

Ratyakshi Nain<sup>a</sup>, Saiyam Dobhal<sup>a</sup>, Parth Bidaliya<sup>a</sup>, Gajender Saini<sup>b</sup>, Balaram Pani<sup>a\*</sup>,

Sidhharth Sirohi<sup>a\*</sup>

<sup>a</sup>Bhaskaracharya College of Applied Sciences, University of Delhi, Delhi-110075, India

<sup>b</sup>CRNTS, IIT-Mumbai, Maharashtra-400076, India

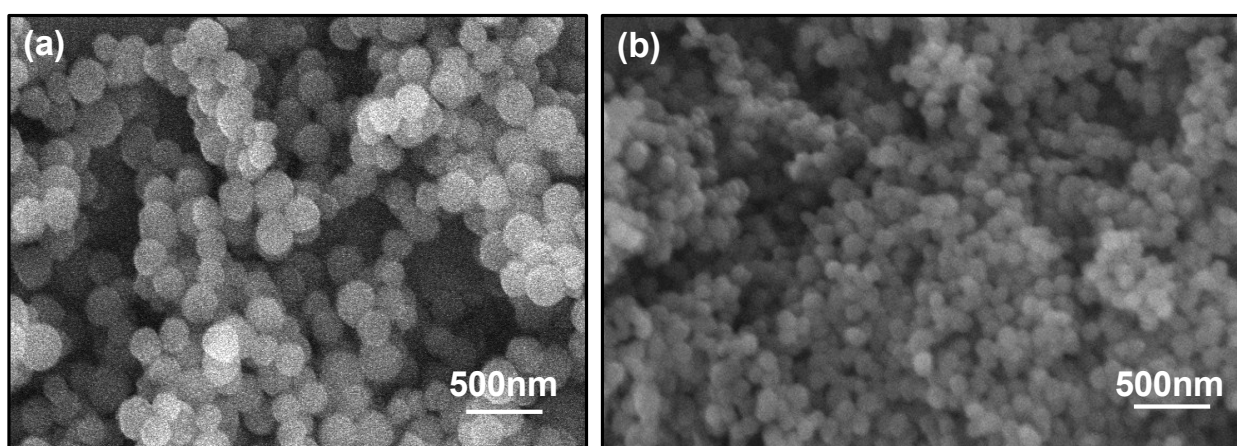

**Figure S1** Scanning electron micrographs of (a) SiO<sub>2</sub> (b) MS- SiO<sub>2</sub>.

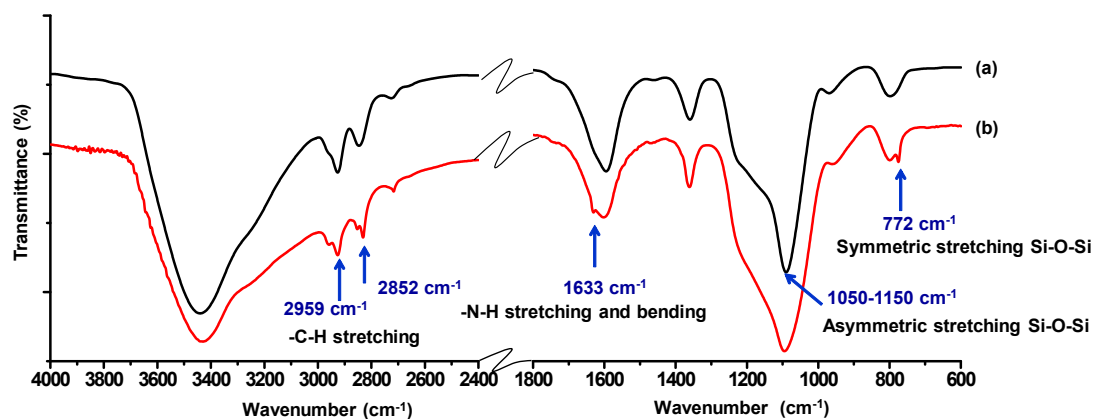

**Figure S2** FTIR spectra of (a) MS and (b) MS-NH<sub>2</sub> nanoparticles.
